# Supplementary material
Source: PubMed Central journal article supplement (PMC7960168)
Supplement: 15-00557.pdf [file 15-00557.pdf]

**On-line Table: Characteristics of all patients (N = 185)**

| Characteristics                                             | VEGF Expression |                 |                | P Value <sup>a</sup> |
|-------------------------------------------------------------|-----------------|-----------------|----------------|----------------------|
|                                                             | Total           | --~++ (n = 103) | +++ (n = 82)   |                      |
| Age                                                         |                 |                 |                |                      |
| Median (range) (yr)                                         | 50 (20–77)      | 52 (20–77)      | 49 (21–69)     |                      |
| 50 or older/younger than 50                                 | 94/91           | 53/50           | 41/41          | .844                 |
| Sex                                                         |                 |                 |                |                      |
| Men/women                                                   | 119:66          | 74:29           | 45:37          | .017                 |
| KPS score                                                   |                 |                 |                |                      |
| 80 or higher/lower than 80                                  | 122/63          | 76/27           | 46/36          | .012                 |
| Tumor volume (mm <sup>3</sup> )                             |                 |                 |                |                      |
| Mean ± SD                                                   | 52,064 ± 32725  | 49,675 ± 28341  | 57,014 ± 40473 | .033 <sup>b</sup>    |
| Brain region involvement <sup>c</sup> (involved/uninvolved) |                 |                 |                |                      |
| Frontal lobe                                                | 81/137          | 50/77           | 31/60          | .424                 |
| Temporal lobe                                               | 84/134          | 46/81           | 38/53          | .407                 |
| Parietal lobe                                               | 44/174          | 23/104          | 21/70          | .368                 |
| Insular                                                     | 9/209           | 8/119           | 1/90           | .119                 |
| Pattern of enhancement                                      |                 |                 |                |                      |
| Ringlike/non-ringlike                                       | 124/61          | 62/41           | 62/20          | .027                 |
| Peritumoral edema                                           |                 |                 |                |                      |
| Yes/no                                                      | 129/56          | 68/35           | 61/21          | .218                 |
| nCET                                                        |                 |                 |                |                      |
| Yes/no                                                      | 74/111          | 36/67           | 38/44          | .116                 |
| IDH1 mutation                                               |                 |                 |                |                      |
| Yes/no                                                      | 16/169          | 10/93           | 6/76           | .565                 |
| MGMT expression                                             |                 |                 |                |                      |
| Yes/no                                                      | 85/22           | 52/16           | 33/6           | .316                 |
| EGFR expression                                             |                 |                 |                |                      |
| Yes/no                                                      | 73/29           | 48/20           | 25/9           | .756                 |
| Extent of resection                                         |                 |                 |                |                      |
| GTR/<GTR                                                    | 112/73          | 53/50           | 59/23          | .005                 |
| Adjuvant therapy                                            |                 |                 |                |                      |
| Standard therapy <sup>d</sup> /non-standard therapy         | 141/44          | 76/27           | 65/17          | .384                 |

**Note:**—MGMT indicates *O*6-methylguanine DNA methyltransferase; IDH1, *isocitrate dehydrogenase 1*; EGFR, epidermal growth factor receptor.

<sup>a</sup> Result of the  $\chi^2$  test. *P* value of .05 denotes significance.

<sup>b</sup> Result of a *t* test. *P* value of .05 denotes significance.

<sup>c</sup> The frequency of tumor involvement in each brain lobe.

<sup>d</sup> Standard therapy includes concomitant temozolomide administration with fractionated radiotherapy followed by up to 6 cycles of adjuvant temozolomide.
